# Supplementary material for: Unraveling the photocatalytic potential of transition metal sulfide and selenide monolayers for overall water splitting and photo-corrosion inhibition
Source: Royal Society of Chemistry journal article supplement (doi:10.1039/d3ta07106e), 2024-01-01
Supplement: d3ta07106e1.pdf [file d3ta07106e1.pdf]

**Supplementary data for**

**Unraveling the Photocatalytic Potential of Transition Metal sulfides and selenides  
Monolayers for Overall Water Splitting and Photo-corrosion inhibition**

Shafiq Ur Rehman<sup>a, b</sup>, Junwei Wang<sup>a, b</sup>, Guixuan Wu<sup>c</sup>, Sajjad Ali<sup>d</sup>, Jian Xian<sup>\*a, b</sup>, Nasir  
Mahmood<sup>\*c</sup>

<sup>a</sup> Yangtze Delta Region Institute (Huzhou), University of Electronic Science and Technology of  
China, Huzhou 313001, China.

<sup>b</sup> School of Materials and Energy, University of Electronic Science and Technology of China,  
Chengdu, 611731, China.

<sup>c</sup> State key Laboratory of Coal Conversion, Institute of Coal Chemistry, Chinese Academy of  
Sciences, Taiyuan, 030001, China.

<sup>d</sup> Energy, Water, and Environment Lab, College of Humanities and Sciences, Prince Sultan  
University, Riyadh 11586, Saudi Arabia

<sup>e</sup> School of Science, RMIT University, 124 La Trobe Street, 3001 Melbourne, Victoria, Australia.

\*Corresponding authors Email: [jianxian@uestc.edu.cn](mailto:jianxian@uestc.edu.cn) ; [nasir.mahmood@rmit.edu.au](mailto:nasir.mahmood@rmit.edu.au)

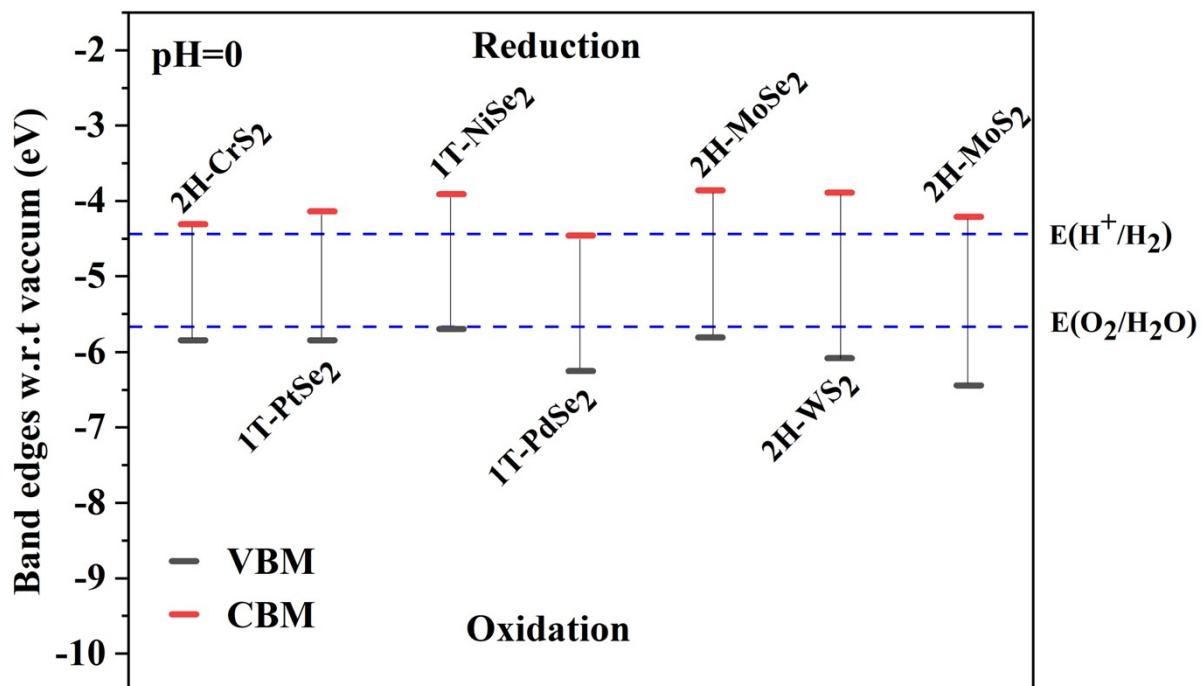

**Figure S1.** Thermodynamically stable monolayers with suitable CBM (red bars) and VBM (black bars) w.r.t vacuum level for overall water splitting (OWS). The blue dotted lines represent the standard potential for water reduction (-4.45 eV) and oxidation (-5.67 eV) at pH=0.

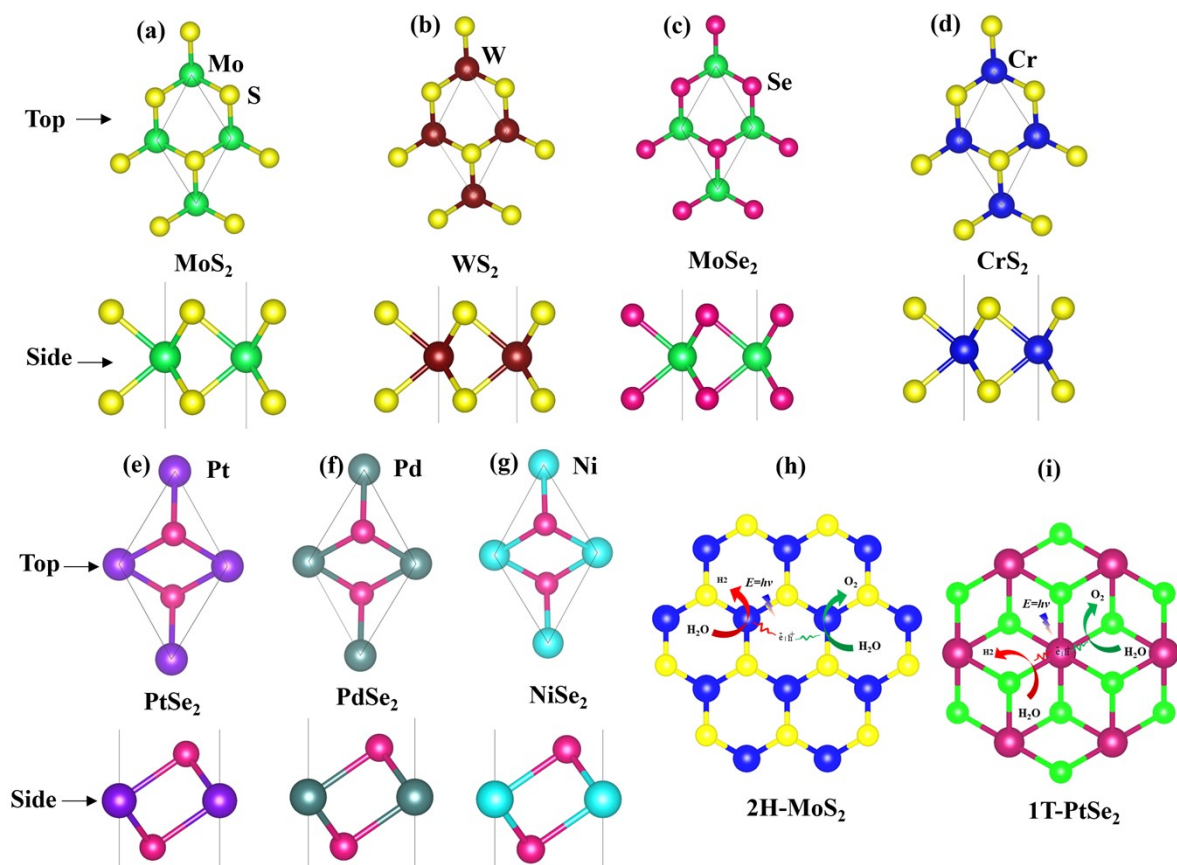

**Figure S2.** Promising TMSS monolayers with suitable band edge positions for OWS (a-d) Top and side view of MoS<sub>2</sub>, WS<sub>2</sub>, MoSe<sub>2</sub> and CrS<sub>2</sub> monolayers in 2H phase (e-g) Top and side view of 1T phase PtSe<sub>2</sub>, PdSe<sub>2</sub> and NiSe<sub>2</sub> monolayers (h-i) Schematic illustration of OWS reactions on 2H-MoS<sub>2</sub> and 1T-PtSe<sub>2</sub> monolayers without incorporating any co-catalyst.

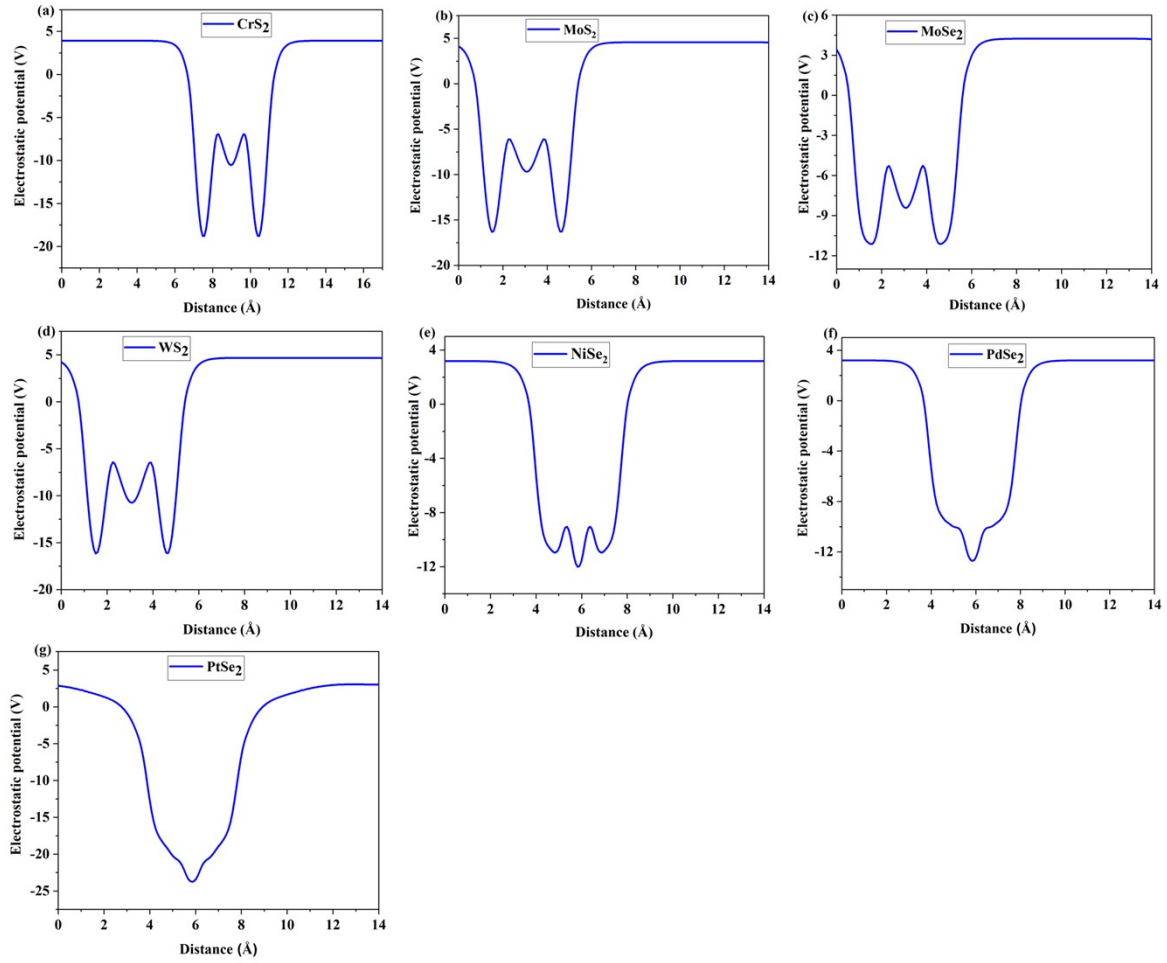

**Figure S3.** The  $G_0W_0$  based calculated electrostatic potentials for (a-d)  $\text{CrS}_2$ ,  $\text{MoS}_2$ ,  $\text{MoSe}_2$ , and  $\text{WS}_2$  monolayers in 2H phase (e-g)  $\text{NiSe}_2$ ,  $\text{PdSe}_2$  and  $\text{PtSe}_2$  monolayers in 1T phase for extracting the conduction band edge (CBM) and valence band edge (VBM) w.r.t the vacuum level.

**Table S1** The  $G_0W_0$  calculated CBM, VBM and vacuum level ( $\phi_{\text{vac}}$ ) of the  $\text{CrS}_2$ ,  $\text{MoS}_2$ ,  $\text{MoSe}_2$ ,  $\text{WS}_2$ ,  $\text{NiSe}_2$ ,  $\text{PdSe}_2$  and  $\text{PtSe}_2$  monolayers are given below.

| property            | $\text{CrS}_2$ | $\text{MoS}_2$ | $\text{MoSe}_2$ | $\text{WS}_2$ | $\text{NiSe}_2$ | $\text{PdSe}_2$ | $\text{PtSe}_2$ |
|---------------------|----------------|----------------|-----------------|---------------|-----------------|-----------------|-----------------|
| CBM (eV)            | -3.44          | -3.09          | -3.06           | -3.26         | -4.14           | -3.84           | -3.65           |
| VBM (eV)            | -5.80          | -5.75          | -5.07           | -5.76         | -4.92           | -5.20           | -5.84           |
| $\phi_{\text{vac}}$ | 3.91           | 4.58           | 4.24            | 4.68          | 3.192           | 3.19            | 3.32            |

**Table S2.** The proposed mechanism for calculating the thermodynamic oxidation and reduction potentials of TMSS monolayers.

| System            | Reaction equation                                                                | $\Delta ZPE-T\Delta S$<br>( $P_{(gas, atm)}, 10^{-2}-10^{-4}$ ) | $\Delta E$ | Potential        | Type      |
|-------------------|----------------------------------------------------------------------------------|-----------------------------------------------------------------|------------|------------------|-----------|
| CrS <sub>2</sub>  | CrS <sub>2</sub> +2H <sub>2</sub> O-> CrO <sub>2</sub> +2H <sub>2</sub> +2S      | -0.35, -0.46, -0.59                                             | 4.02       | 0.92, 0.89, 0.86 | oxidation |
|                   | CrS <sub>2</sub> +2H <sub>2</sub> -> Cr + 2H <sub>2</sub> S                      | -0.17, -0.17, -0.17                                             | 1.42       | 0.31, 0.31, 0.13 | reduction |
| MoS <sub>2</sub>  | MoS <sub>2</sub> +2H <sub>2</sub> O-><br>MoO <sub>2</sub> +2H <sub>2</sub> +2S   | -0.36, -0.46, -0.58                                             | 4.38       | 1.0, 0.98, 0.95  | oxidation |
|                   | MoS <sub>2</sub> +2H <sub>2</sub> -> Mo + 2H <sub>2</sub> Se                     | -0.18, -0.18, -0.81                                             | 2.05       | 0.47, 0.47, 0.47 | reduction |
| MoSe <sub>2</sub> | MoSe <sub>2</sub> +2H <sub>2</sub> O-><br>MoO <sub>2</sub> +2H <sub>2</sub> +2Se | -0.35, -0.47, -0.59                                             | 2.69       | 0.58, 0.56, 0.53 | oxidation |
|                   | MoSe <sub>2</sub> +2H <sub>2</sub> -> Mo + 2H <sub>2</sub> Se                    | -0.17, -0.17, -0.17                                             | 2.37       | 0.55, 0.55, 0.55 | reduction |
| WS <sub>2</sub>   | WS <sub>2</sub> +2H <sub>2</sub> O-> WO <sub>2</sub> +2H <sub>2</sub> +2S        | -0.36, -0.46, -0.58                                             | 4.08       | 0.93, 0.87, 0.87 | oxidation |
|                   | WS <sub>2</sub> +2H <sub>2</sub> -> W + 2H <sub>2</sub> S                        | -0.18, -0.18, -0.18                                             | 1.87       | 0.42, 0.42, 0.42 | reduction |
| NiSe <sub>2</sub> | NiSe <sub>2</sub> +2H <sub>2</sub> O-><br>NiO <sub>2</sub> +2H <sub>2</sub> +2Se | -0.31, -0.43, -0.55                                             | 4.79       | 1.12, 1.09, 1.06 | oxidation |
|                   | NiSe <sub>2</sub> +2H <sub>2</sub> -> Ni + 2H <sub>2</sub> Se                    | -0.17, -0.17, -0.17                                             | 1.37       | 0.30, 0.30, 0.30 | reduction |
| PdSe <sub>2</sub> | PdSe <sub>2</sub> +2H <sub>2</sub> O-><br>PdO <sub>2</sub> +2H <sub>2</sub> +2Se | -0.33, -0.45, -0.57                                             | 6.69       | 1.59, 1.56, 1.53 | oxidation |
|                   | PdSe <sub>2</sub> +2H <sub>2</sub> -> Pd + 2H <sub>2</sub> Se                    | -0.17, -0.17, -0.17                                             | 1.08       | 0.23, 0.23, 0.23 | reduction |
| PtSe <sub>2</sub> | PtSe <sub>2</sub> +2H <sub>2</sub> O-> PtO <sub>2</sub> +2H <sub>2</sub> +2Se    | -0.33, -0.45, -0.57                                             | 5.83       | 1.38, 1.35, 1.32 | oxidation |
|                   | PtSe <sub>2</sub> +2H <sub>2</sub> -> Pt + 2H <sub>2</sub> Se                    | -0.17, -0.17, -0.17                                             | 1.55       | 0.35, 0.35, 0.35 | reduction |

The Gibbs free energy change of reactants and products involved in the proposed mechanism of thermodynamic oxidation and reduction potentials are calculated according to the following equations.

$$\Delta G1 = G(\text{CrO}_2)+2G(\text{H}_2)+2G(\text{S})-G(\text{CrS}_2)-2G(\text{H}_2\text{O}) \quad (1)$$

$$\Delta G2 = G(\text{Cr})+2G(\text{H}_2\text{S})-G(\text{CrS}_2)-2G(\text{H}_2) \quad (2)$$

$$\Delta G3 = G(\text{MoO}_2)+2G(\text{H}_2)+2G(\text{S})-G(\text{MoS}_2)-2G(\text{H}_2\text{O}) \quad (3)$$

$$\Delta G4 = G(\text{Mo})+2G(\text{H}_2\text{S})-G(\text{MoS}_2)-2G(\text{H}_2) \quad (4)$$

$$\Delta G5 = G(\text{MoO}_2)+2G(\text{H}_2)+2G(\text{Se})-G(\text{MoSe}_2) - 2G(\text{H}_2\text{O}) \quad (5)$$

$$\Delta G_6 = G(\text{Mo}) + 2G(\text{H}_2\text{Se}) - G(\text{MoSe}_2) - 2G(\text{H}_2) \quad (6)$$

$$\Delta G_7 = G(\text{WO}_2) + 2G(\text{H}_2) + 2G(\text{S}) - G(\text{WS}_2) - 2G(\text{H}_2\text{O}) \quad (7)$$

$$\Delta G_8 = G(\text{W}) + 2G(\text{H}_2\text{S}) - G(\text{WS}_2) - 2G(\text{H}_2) \quad (8)$$

$$\Delta G_9 = G(\text{NiO}_2) + 2G(\text{H}_2) + 2G(\text{Se}) - G(\text{NiSe}_2) - 2G(\text{H}_2\text{O}) \quad (9)$$

$$\Delta G_{10} = G(\text{Ni}) + 2G(\text{H}_2\text{Se}) - G(\text{NiSe}_2) - 2G(\text{H}_2) \quad (10)$$

$$\Delta G_{11} = G(\text{PdO}_2) + 2G(\text{H}_2) + 2G(\text{Se}) - G(\text{PdSe}_2) - 2G(\text{H}_2\text{O}) \quad (11)$$

$$\Delta G_{12} = G(\text{Pd}) + 2G(\text{H}_2\text{Se}) - G(\text{PdSe}_2) - 2G(\text{H}_2) \quad (12)$$

$$\Delta G_{13} = G(\text{PtO}_2) + 2G(\text{H}_2) + 2G(\text{Se}) - G(\text{PtSe}_2) - 2G(\text{H}_2\text{O}) \quad (13)$$

$$\Delta G_{14} = G(\text{Pt}) + 2G(\text{H}_2\text{Se}) - G(\text{PtSe}_2) - 2G(\text{H}_2) \quad (14)$$

During the free energy calculations in equations (1-14), when reactants and products have different phases (crystal, solution or gas), the phase with the lowest Gibbs free energy under 300 K and 1 bar is considered. Where for the solids the considered temperature is 300K in all energy corrections. All structures for reactants and products are considered in bulk form. The reaction conditions for the calculations of free energies of reactants and products involved in the reduction and oxidation potentials are shown below.

| Entity                         | Temperature (K) | Pressure (atm)                     | Phase  |
|--------------------------------|-----------------|------------------------------------|--------|
| H <sub>2</sub> O               | 300             | 0.035                              | liquid |
| H <sub>2</sub>                 | 300             | 10 <sup>-2</sup> -10 <sup>-4</sup> | gas    |
| H <sub>2</sub> S               | 300             | 10 <sup>-2</sup> -10 <sup>-4</sup> | gas    |
| O <sub>2</sub>                 | 300             | 0.21                               | gas    |
| CO <sub>2</sub>                | 300             | 0.00039                            | gas    |
| CH <sub>2</sub> O <sub>2</sub> | 300             | 10 <sup>-2</sup> -10 <sup>-4</sup> | liquid |

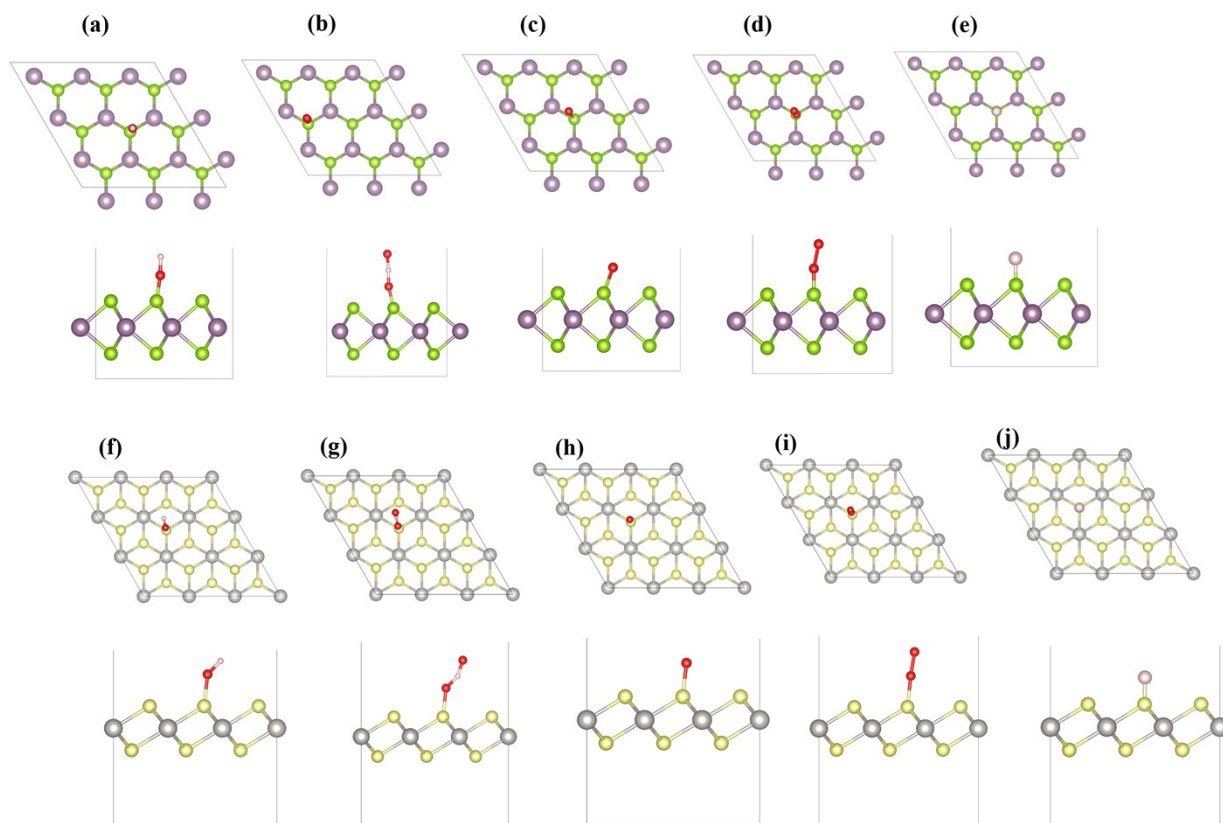

**Figure S4.** The top and side views of the optimized structures of stable adsorption sites of  $OH^*$ ,  $O^*$ ,  $O-H-O^*$ ,  $O_2^*$  and  $H^*$  intermediates on the surface of  $3 \times 3 \times 1$  supercell (a-e) 2H-MoS<sub>2</sub> monolayer (f-j) 1T-PtSe<sub>2</sub> monolayer.
